# Supplementary material for: BACE1 elevation engendered by GGA3 deletion increases β-amyloid pathology in association with APP elevation and decreased CHL1 processing in 5XFAD mice
Source: PubMed Central journal article supplement (PMC5796504; doi:10.1186/s13024-018-0239-7), 2018-02-02
Supplement: 13024_2018_239_MOESM4_ESM.pdf [file 13024_2018_239_MOESM4_ESM.pdf]

# APP<sup>swe</sup>/PS1 $\Delta$ E9

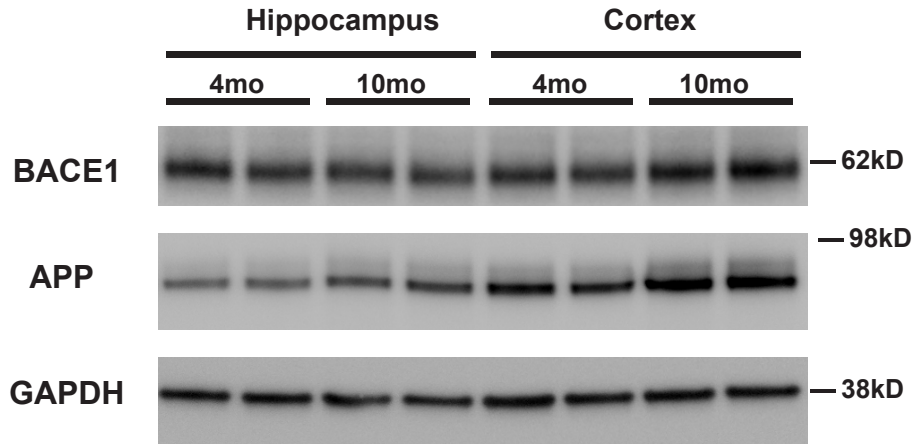

Additional File 4
