# Supplementary material for: BACE1 elevation engendered by GGA3 deletion increases β-amyloid pathology in association with APP elevation and decreased CHL1 processing in 5XFAD mice
Source: PubMed Central journal article supplement (PMC5796504; doi:10.1186/s13024-018-0239-7), 2018-02-02
Supplement: 13024_2018_239_MOESM5_ESM.pdf [file 13024_2018_239_MOESM5_ESM.pdf]

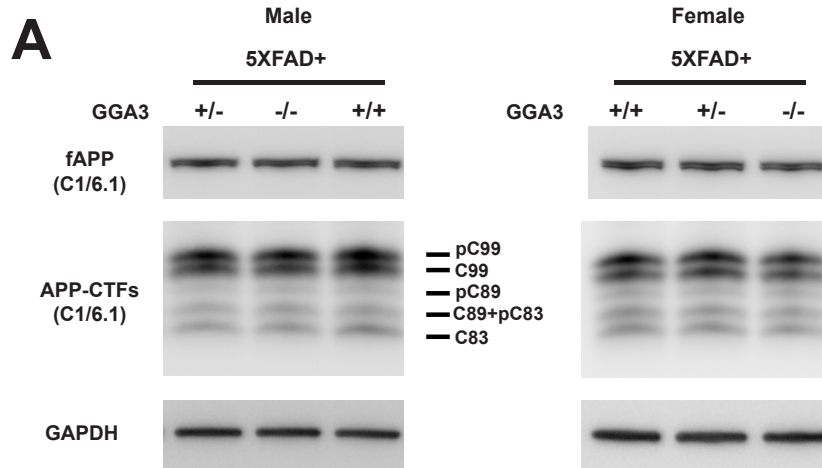

**B**

Western blot analysis of fAPP and CTFs levels (Mean  $\pm$  SEM)

|        |            | GGA3 <sup>+/+</sup> ;5XFAD (n=8) | GGA3 <sup>+/-</sup> ;5XFAD (n=8) | GGA3 <sup>-/-</sup> ;5XFAD (n=9) |
|--------|------------|----------------------------------|----------------------------------|----------------------------------|
| Male   | fAPP/GAPDH | 1.09 $\pm$ 0.03                  | 0.96 $\pm$ 0.03                  | 0.92 $\pm$ 0.04                  |
|        | pC99/fAPP  | 1.07 $\pm$ 0.07                  | 1.05 $\pm$ 0.09                  | 1.09 $\pm$ 0.06                  |
|        | C99/fAPP   | 1.18 $\pm$ 0.09                  | 1.03 $\pm$ 0.05                  | 1.07 $\pm$ 0.05                  |
|        | pC89/fAPP  | 1.12 $\pm$ 0.05                  | 0.96 $\pm$ 0.08                  | 1.14 $\pm$ 0.06                  |
| Female | fAPP/GAPDH | 1.03 $\pm$ 0.04                  | 0.93 $\pm$ 0.04                  | 1.05 $\pm$ 0.05                  |
|        | pC99/fAPP  | 0.96 $\pm$ 0.06                  | 1.02 $\pm$ 0.05                  | 1.06 $\pm$ 0.07                  |
|        | C99/fAPP   | 1.00 $\pm$ 0.04                  | 1.08 $\pm$ 0.04                  | 0.95 $\pm$ 0.04                  |
|        | pC89/fAPP  | 1.04 $\pm$ 0.09                  | 1.01 $\pm$ 0.07                  | 1.01 $\pm$ 0.09                  |
