# Supplementary material for: BACE1 elevation engendered by GGA3 deletion increases β-amyloid pathology in association with APP elevation and decreased CHL1 processing in 5XFAD mice
Source: Springer Nature journal article supplement (doi:10.1186/s13024-018-0239-7), 2018-02-02
Supplement: MOESM2 [file 15432934]

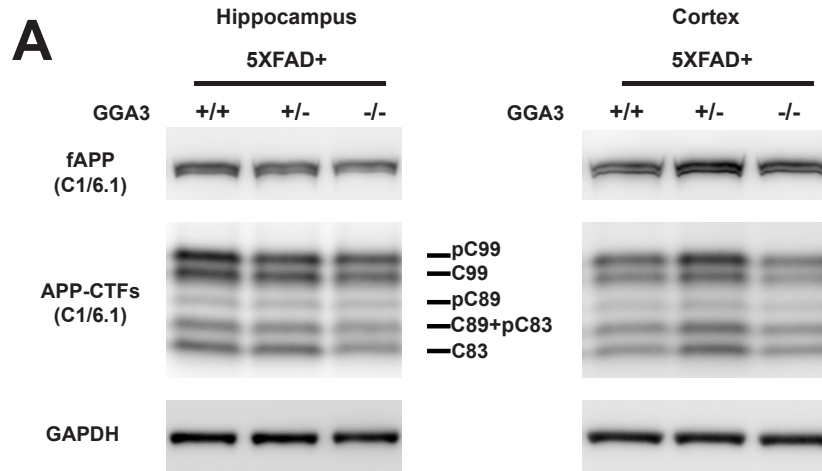

**B**

Western blot analysis of fAPP and CTFs levels (Mean  $\pm$  SEM)

|             |                 | GGA3 <sup>+/+</sup> ;5XFAD | GGA3 <sup>+/-</sup> ;5XFAD | GGA3 <sup>-/-</sup> ;5XFAD |
|-------------|-----------------|----------------------------|----------------------------|----------------------------|
|             |                 | (n=8)                      | (n=9)                      | (n=7)                      |
| Hippocampus | fAPP/GAPDH      | 1.07 $\pm$ 0.05            | 0.94 $\pm$ 0.03            | 0.94 $\pm$ 0.04            |
|             | pC99/fAPP       | 1.03 $\pm$ 0.05            | 0.93 $\pm$ 0.10            | 1.05 $\pm$ 0.11            |
|             | C99/fAPP        | 1.28 $\pm$ 0.13            | 1.04 $\pm$ 0.09            | 1.05 $\pm$ 0.14            |
|             | pC89/fAPP       | 1.00 $\pm$ 0.07            | 0.89 $\pm$ 0.13            | 0.86 $\pm$ 0.10            |
| Cortex      |                 | GGA3 <sup>+/+</sup> ;5XFAD | GGA3 <sup>+/-</sup> ;5XFAD | GGA3 <sup>-/-</sup> ;5XFAD |
|             |                 | (n=8)                      | (n=10)                     | (n=8)                      |
|             | fAPP/GAPDH      | 1.03 $\pm$ 0.07            | 1.01 $\pm$ 0.08            | 0.99 $\pm$ 0.07            |
|             | pC99/fAPP       | 0.95 $\pm$ 0.95            | 0.80 $\pm$ 0.09            | 0.86 $\pm$ 0.08            |
| C99/fAPP    | 0.94 $\pm$ 0.07 | 0.73 $\pm$ 0.07            | 0.85 $\pm$ 0.10            |                            |
| pC89/fAPP   | 1.03 $\pm$ 0.10 | 0.84 $\pm$ 0.09            | 0.96 $\pm$ 0.11            |                            |
