# Supplementary material for: BACE1 elevation engendered by GGA3 deletion increases β-amyloid pathology in association with APP elevation and decreased CHL1 processing in 5XFAD mice
Source: Springer Nature journal article supplement (doi:10.1186/s13024-018-0239-7), 2018-02-02

**A**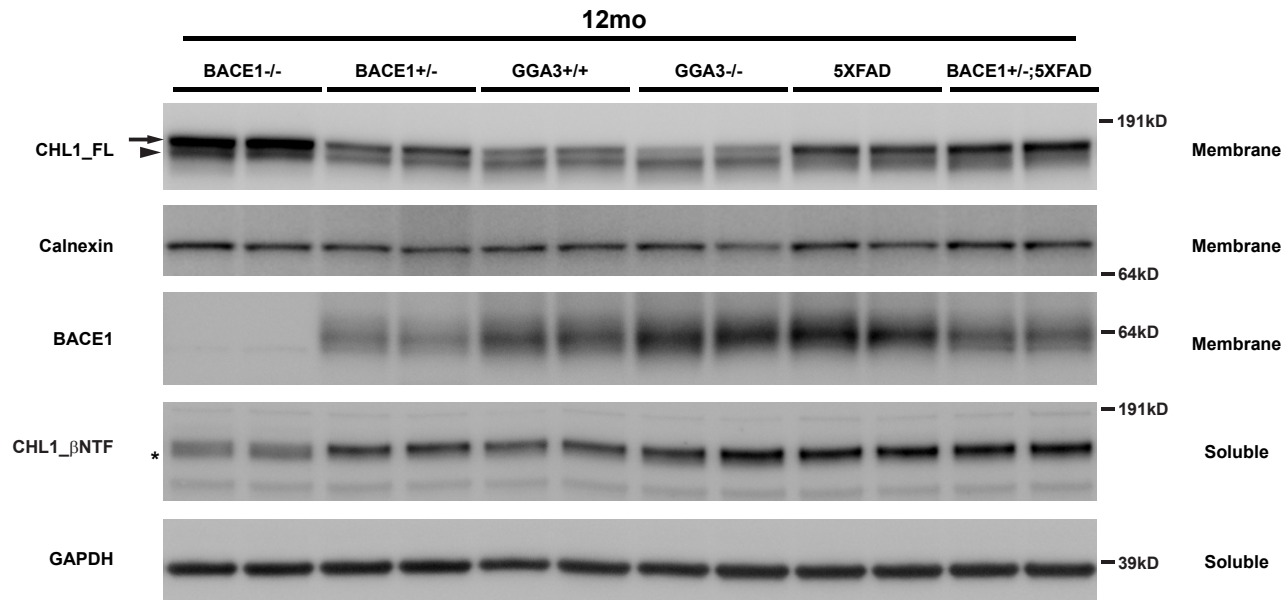**B**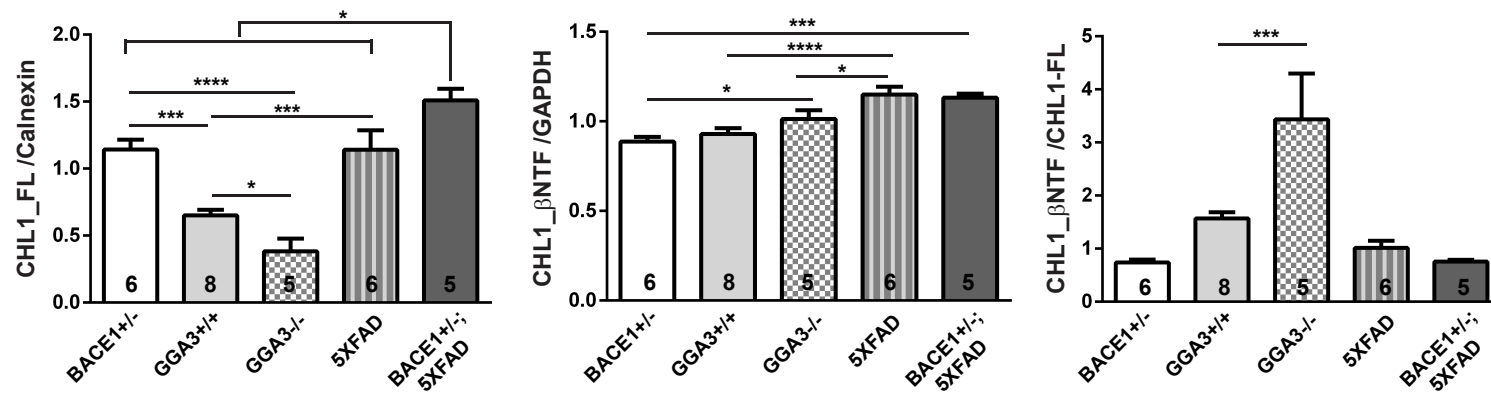

Supplement: MOESM7 [file 15432934]
